# Supplementary material for: Prediction of the Potential Role of Polydatin against HIV-1 Protease and HIV-2 Protease by SWISSDock Server
Source: Preprints.org preprint supplement (doi:10.20944/preprints202311.0531.v1), 2023-11-08
Supplement: Supplementary file 1 [file supplementary]

**Supporting Information**

# PDB Code : 1HVK

HIV-1 PROTEASE-Crystal Ligand A79 COMPLEX ( N-{1-BENZYL-(2S,3S)-2,3-DIHYDROXY-4-[3-METHYL-2-(3-METHYL-3-PYRIDIN-2-YLMETHYL-UREIDO)-BUTYRYLAMINO]-5-PHENYL-PENTYL}-3-METHYL-2-(3-METHYL-3-PYRIDIN-2-YLMETHYL-UREIDO)-BUTYRAMIDE)


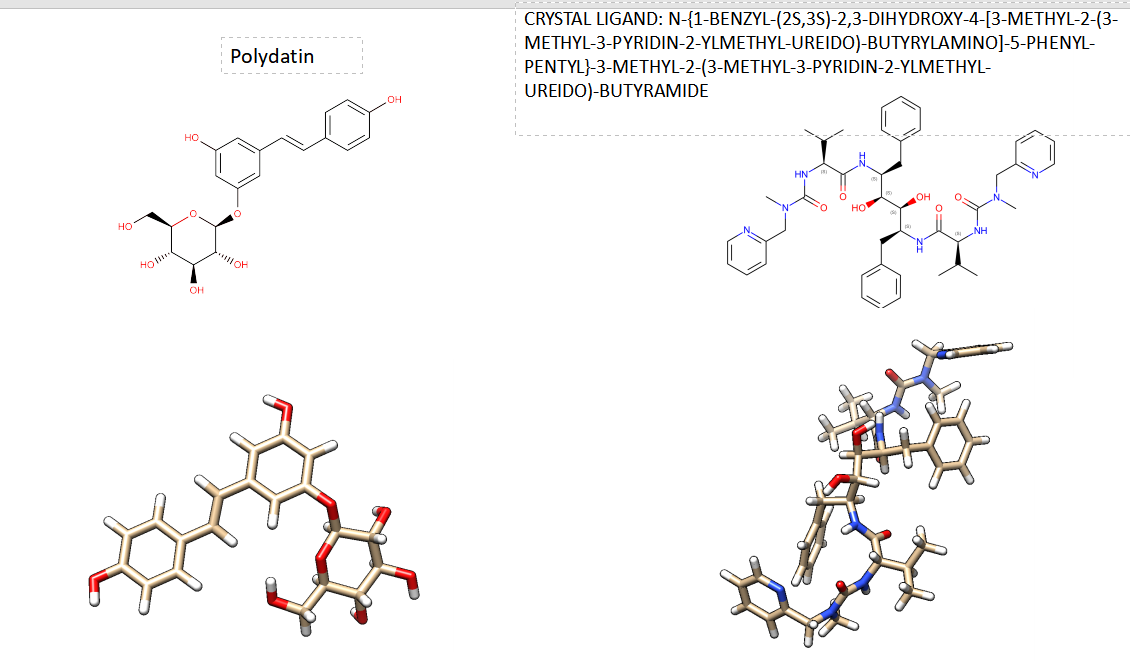


**SP Fig.1**  Comparison 2D and 3D structures of Polydatin and Crystal Ligand A79 COMPLEX ( N-{1-BENZYL-(2S,3S)-2,3-DIHYDROXY-4-[3-METHYL-2-(3-METHYL-3-PYRIDIN-2-YLMETHYL-UREIDO)-BUTYRYLAMINO]-5-PHENYL-PENTYL}-3-METHYL-2-(3-METHYL-3-PYRIDIN-2-YLMETHYL-UREIDO)-BUTYRAMIDE

# PDB Code : 1HII

HIV-2 PROTEASE-Crystal Ligand C20 COMPLEX (ACETYL-NH-VAL-CYCLOHEXYL-CH2[NCH2CHOH]CH2-BENZYL-VAL-NH-ACETYL)


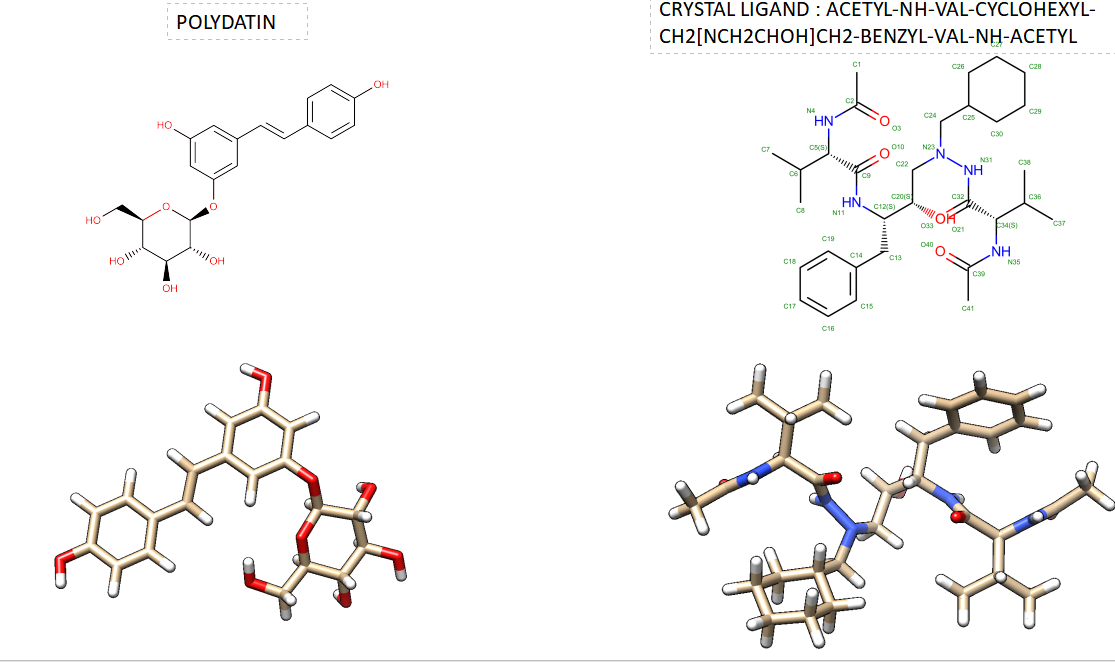


**SP Fig.2**  Comparison 2D and 3D structures of Polydatin and Crystal Ligand C20 COMPLEX (ACETYL-NH-VAL-CYCLOHEXYL-CH2[NCH2CHOH]CH2-BENZYL-VAL-NH-ACETYL)

**SP Fig.3**  Comparison Similary Scores performed by SWISS Similary web tool and Drug Bank


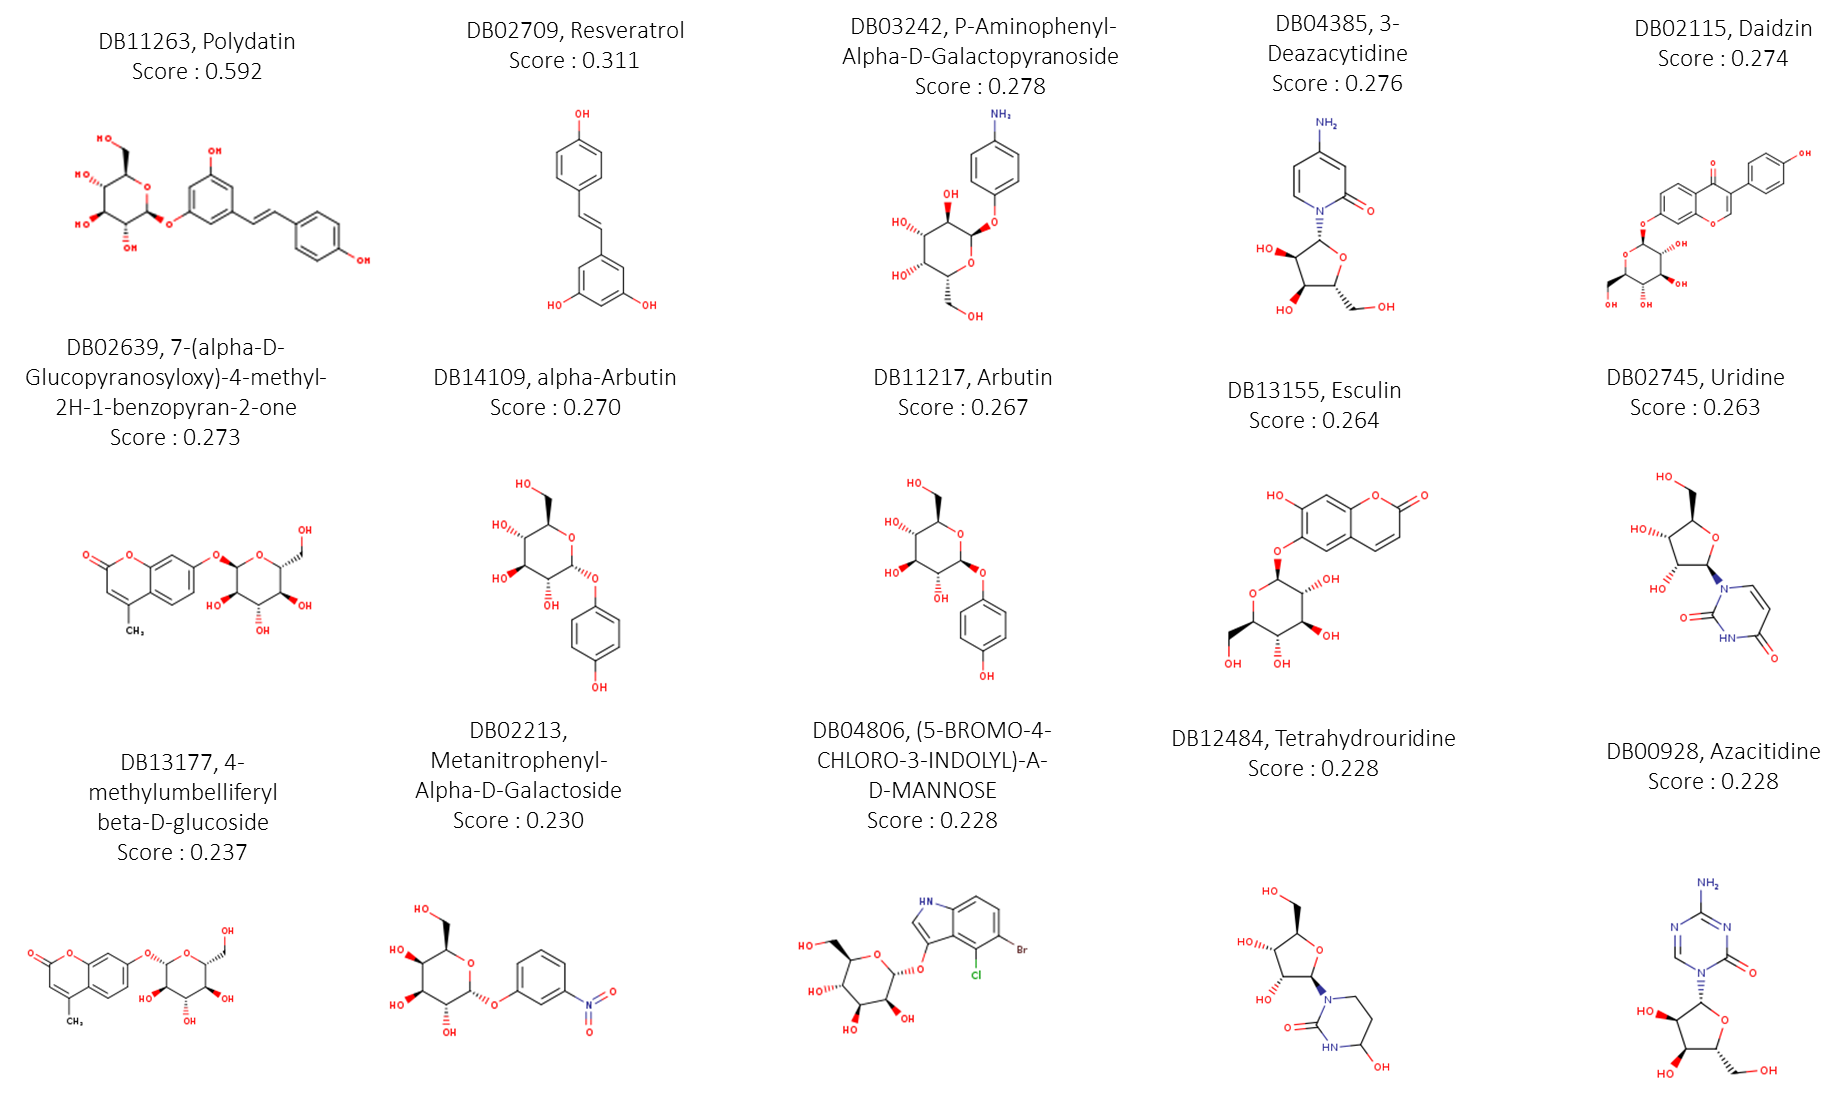


**SP Fig.4**  Comparison 2D Structures were evaluated by Drug Bank through SWISS Similary web tool


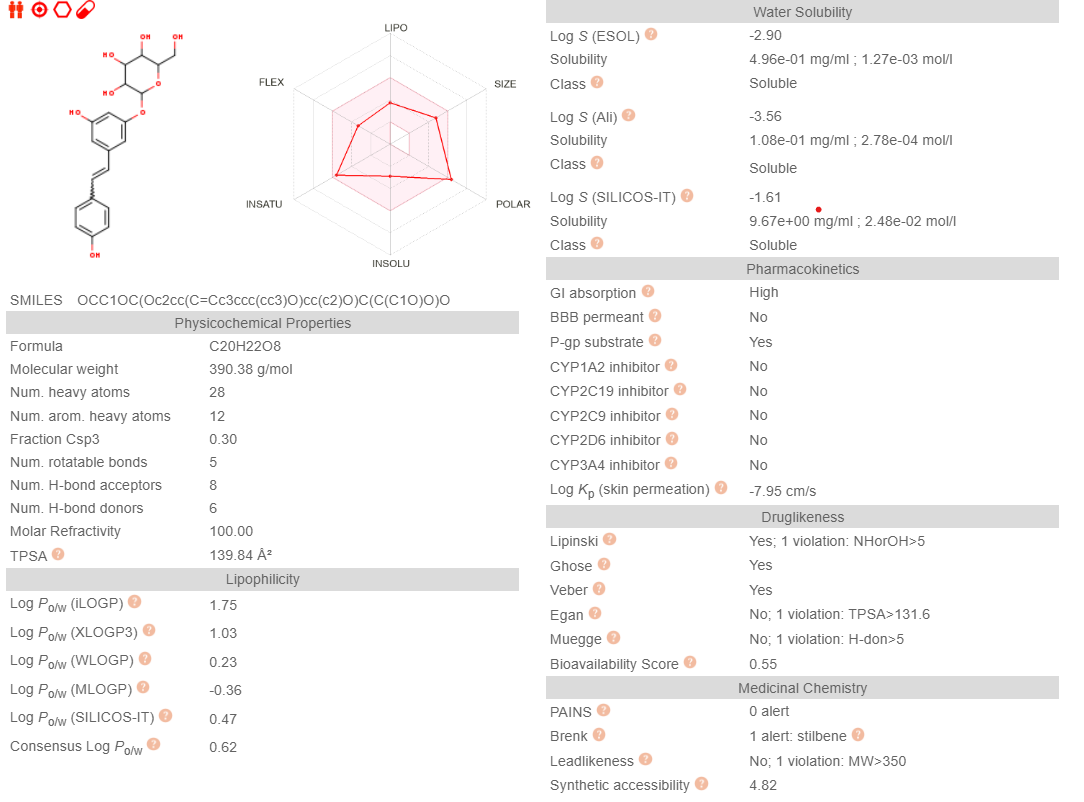


**SP Fig.5** Comparison chemical-physical, biological properties of Polydatin were performed by Swiss ADME web tool


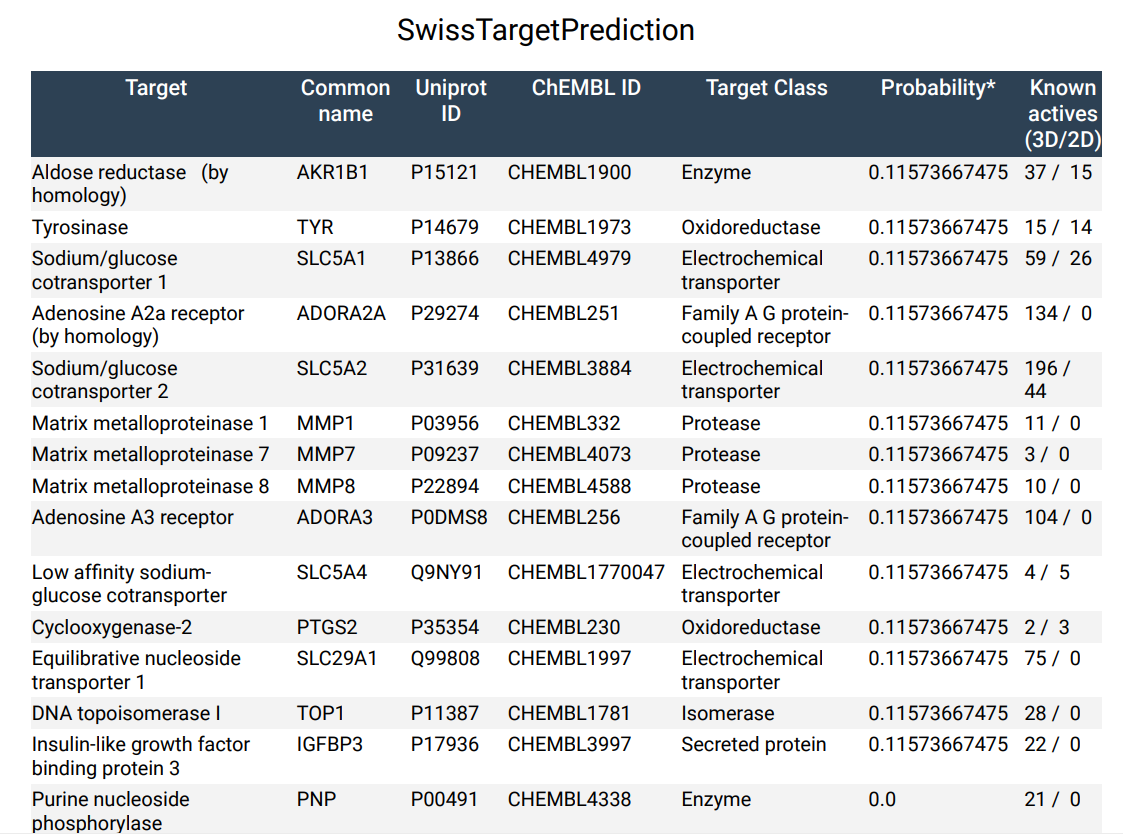


**SP Fig.6** Comparison potential targets of Polydatin were performed by Swiss Target prediction web tool
